# Supplementary material for: Vaccine Side Effects Following COVID-19 Vaccination Among the Residents of the UAE—An Observational Study
Source: PubMed Central journal article supplement (PMC9120526; doi:10.3389/fpubh.2022.876336), 2022-05-06

**Table S1: Demographical variables of the study participants**

| <b>Variables</b>                   |                               | <b>n</b> | <b>Percentage %</b> |
|------------------------------------|-------------------------------|----------|---------------------|
| <b>Age group</b>                   | <35 years                     | 599      | 31.9%               |
|                                    | 35-54 years                   | 940      | 50.1%               |
|                                    | ≥ 55 years                    | 339      | 18.1%               |
| <b>Gender</b>                      | Female                        | 1151     | 61.3%               |
|                                    | Male                          | 727      | 38.7%               |
| <b>Educational status</b>          | Graduate/Post graduate degree | 1153     | 61.4%               |
|                                    | High school / Diploma         | 429      | 22.9%               |
|                                    | Less than high school         | 162      | 8.6%                |
|                                    | No formal education           | 134      | 7.1%                |
|                                    |                               |          |                     |
| <b>Income</b>                      | ≤ 10,000 AED                  | 572      | 38.6 %              |
|                                    | 10,000 and above              | 969      | 61.4%               |
|                                    | Did not disclose              | 519      | 27.6%               |
| <b>Nationality</b>                 | Emirati                       | 909      | 48.4%               |
|                                    | Non-Emirati                   | 969      | 51.6 %              |
| <b>Comorbidities</b>               | With comorbidities            | 526      | 28%                 |
|                                    | No comorbidities              | 1352     | 72%                 |
| <b>Previous COVID-19 infection</b> | Yes                           | 332      | 17.7%               |
|                                    | No                            | 1546     | 82.3%               |
| <b>Type of vaccine</b>             | Sinopharm                     | 941      | 50.1%               |
|                                    | Pfizer                        | 890      | 47.4%               |
|                                    | Others                        | 47       | 2.5%                |
| <b>Adverse effects</b>             | Yes                           | 1217     | 64.8%               |
|                                    | No                            | 661      | 35.2%               |
| <b>Total</b>                       |                               | 1878     | 100%                |

**Table S2: Local and systemic side effects**

| <b>Side effects (n = 1878)</b> |                                              | <b>n (%)</b> |
|--------------------------------|----------------------------------------------|--------------|
| <b>Local</b>                   | Pain at the site of the vaccine              | 882 (47)     |
|                                | Redness                                      | 36 (1.9)     |
|                                | Itch                                         | 31 (1.7)     |
|                                | Enlarged/swollen lymph nodes                 | 10 (0.5)     |
| <b>Systemic</b>                | Drowsiness and Fatigue                       | 530 (28.2)   |
|                                | Muscle and Joint pain                        | 433 (23.1)   |
|                                | Headache                                     | 332 (17.7)   |
|                                | Fever                                        | 270 (14.4)   |
|                                | Chills                                       | 98 (5.2)     |
|                                | Feeling dizzy                                | 70 (3.7)     |
|                                | Nausea                                       | 61 (3.2)     |
|                                | Difficulty in sleeping                       | 50 (2.7)     |
|                                | Decreased appetite                           | 46 (2.4)     |
|                                | Flu-like symptoms                            | 39 (2.1)     |
|                                | Muscle weakness                              | 38 (2)       |
|                                | Heavy sweating                               | 36 (1.9)     |
|                                | Abdominal pain                               | 34 (1.8)     |
|                                | Feeling nervous                              | 10 (0.5)     |
|                                | Rash                                         | 7 (0.4)      |
|                                | Constipation                                 | 7 (0.4)      |
|                                | Gastritis                                    | 7 (0.4)      |
|                                | Vomiting                                     | 5 (0.3)      |
|                                | Change or loss of the ability to taste       | 4 (0.2)      |
|                                | Temporary relaxation of one side of the face | 1 (0.1)      |

**Table S3: Association of the adverse effects with the type of vaccine**

|                                                            | Sinopharm              | Pfizer-BioNTech         | Odds ratio          | P value |
|------------------------------------------------------------|------------------------|-------------------------|---------------------|---------|
| Adverse effects                                            | 574 (61.0%)<br>n = 941 | 610 (68.5 %)<br>n = 890 | 1.39<br>(1.14-1.68) | <0.001  |
| Local symptoms                                             | 393 (41.8%)<br>n = 941 | 478 (53.7%)<br>n = 890  | 1.61<br>(1.34-1.94) | <0.001  |
| Systemic symptoms                                          | 417 (44.3%)<br>n = 941 | 432 (48.5%)<br>n = 890  | 1.18<br>(0.98-1.42) | 0.070   |
| Adverse effects after the first dose                       | 214 (37.3%)<br>n = 574 | 103 (16.9%)<br>n = 610  | 2.92<br>(2.23-3.83) | <0.001  |
| Adverse effects after the second dose                      | 208 (36.2%)<br>n = 574 | 268 (43.9%)<br>n = 610  | 1.38<br>(1.09-1.74) | 0.007   |
| Adverse effects after both the doses                       | 128 (22.3%)<br>n = 574 | 232 (38.0%)<br>n = 610  | 2.14<br>(1.66-2.76) | <0.001  |
| Local adverse effects after the first dose                 | 142 (66.4%)<br>n = 214 | 79 (76.7%)<br>n = 103   | 1.67<br>(0.97-2.86) | 0.062   |
| Local adverse effects after the second dose                | 133 (63.9%)<br>n = 208 | 193 (72.0%)<br>n = 268  | 1.45<br>(0.98-2.14) | 0.061   |
| Systemic effects after the first dose                      | 168 (78.5%)<br>n = 214 | 66 (64.1%)<br>n = 103   | 2.04<br>(1.22-3.43) | 0.006   |
| Systemic effects after the second dose                     | 150 (72.1%)<br>n = 208 | 232 (86.6%)<br>n = 268  | 2.49<br>(1.57-3.96) | <0.001  |
| Adverse effects that required consultation/hospitalization | 27 (4.7%)<br>n = 574   | 32 (5.3%)<br>n = 610    | 1.12<br>(0.66-1.90) | 0.668   |

\*Adverse effects: For Sinopharm 24 people (4.2%, n=574) didn't specify when they had these symptoms (after first, second or after both doses)

For Pfizer 7 people (1.1%, n=610) didn't specify when they had these symptoms (after first, second or after both doses)

**Table S4: Number of side effects reported based on age group and type of vaccine**

| Age group   | Vaccine (n)             | Number of side effects reported |           | Adverse effects (%) | Odds ratio               | P value |
|-------------|-------------------------|---------------------------------|-----------|---------------------|--------------------------|---------|
|             |                         | 1-5                             | >5        |                     |                          |         |
| 18-34 years | Sinopharm (366)         | 195 (53.3)                      | 34 (9.3)  | 229 (62.6)          | 1.039<br>(0.923-1.840)   | 0.078   |
|             | Pfizer-BioNTech (210)   | 102 (48.6)                      | 16 (7.6)  | 92 (43.8)           |                          |         |
| 35-54 years | Sinopharm (505)         | 287 (56.8)                      | 26 (5.1)  | 313 (62)            | 1.441<br>(1.752 - 1.184) | <0.001  |
|             | Pfizer-BioNTech (413)   | 231 (55.9)                      | 73 (17.7) | 304 (73.6)          |                          |         |
| ≥ 55 years  | Inactive Sinopharm (70) | 31 (44.3)                       | 1 (1.4)   | 32 (45.7)           | 1.835<br>(1.382-2.436)   | <0.001  |
|             | Pfizer-BioNTech (267)   | 164 (61.4)                      | 24 (9)    | 188 (70.4)          |                          |         |

**Table S5: Treatment for side effects post vaccination based on age group**

| Age group   | Vaccine (n)             | Treatment for adverse effects     |                                                   | Odds ratio             | P value |
|-------------|-------------------------|-----------------------------------|---------------------------------------------------|------------------------|---------|
|             |                         | No treatment/home based treatment | Doctor consultation or a hospital-based treatment |                        |         |
| 18-34 years | Sinopharm (222)         | 208 (93.7)                        | 14 (6.3)                                          | 0.525<br>(0.169-1.635) | 0.525   |
|             | Pfizer-BioNTech (117)   | 113 (96.6)                        | 4 (3.4)                                           |                        |         |
| 35-54 years | Sinopharm (300)         | 289 (96.3)                        | 11 (3.7)                                          | 1.490<br>(0.679-3.268) | 0.318   |
|             | Pfizer-BioNTech (298)   | 282 (94.6)                        | 16 (5.4)                                          |                        |         |
| ≥ 55 years  | Inactive Sinopharm (30) | 28 (93.3)                         | 2 (6.7)                                           | 0.960<br>(0.230-4.519) | 0.958   |
|             | Pfizer-BioNTech (187)   | 175 (93.6)                        | 12 (6.4)                                          |                        |         |

**Figure S1: Severity of side effects**

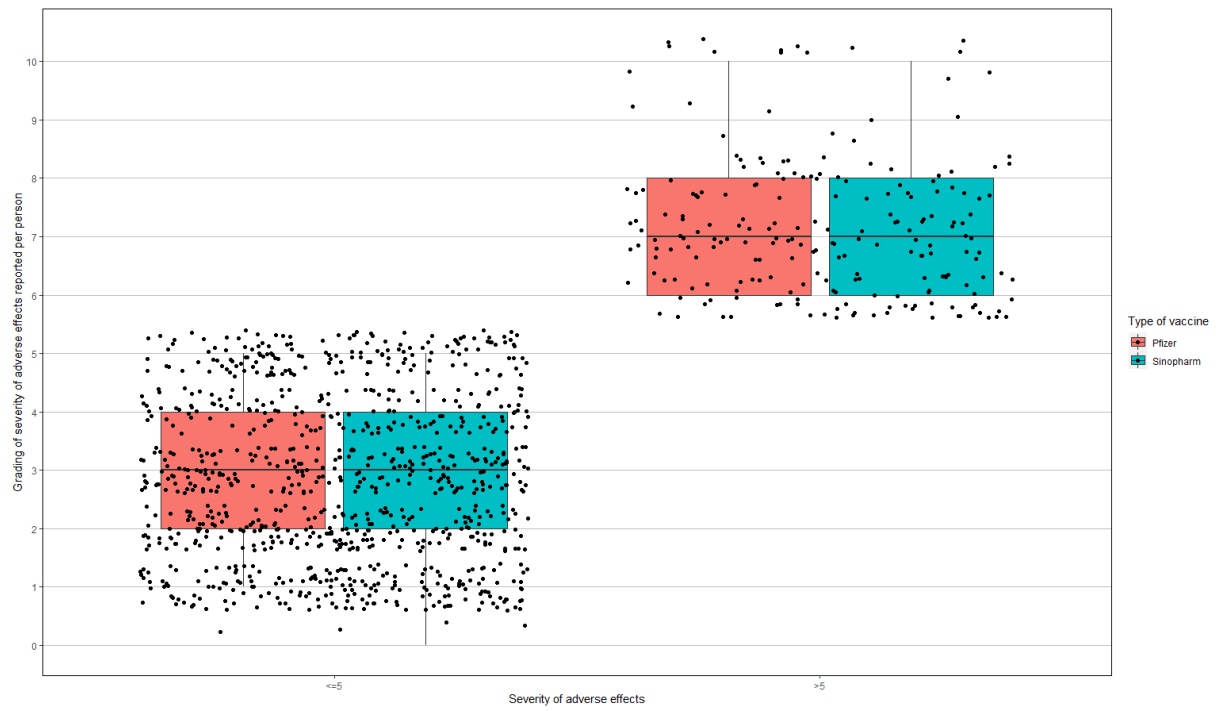

Supplement: Table_1.pdf [file Table_1.pdf]
